# Supplementary material for: Identification of Aerosol Pollution Hotspots in Jiangsu Province of China
Source: MDPI journal article supplement (doi:10.3390/rs13142842), 2021-07-20
Supplement: s1 [file s1]

**Table S1** Evaluation of high-resolution (1 km) MODIS MAIAC AOD against AERONET AOD over NUIST, Taihu, and Xuzhou-CUMT sites located in Jiangsu Province from 2000–2020.

| Sites       | Statistical parameters | Annual | Winter | Spring | Summer | Autumn |
|-------------|------------------------|--------|--------|--------|--------|--------|
| NUIST       | slope                  | 0.971  | 0.873  | 1.224  | 1.006  | -0.056 |
|             | intercept              | -0.106 | -0.046 | -0.219 | -0.222 | 0.381  |
|             | N                      | 79     | 19     | 43     | 14     | 3      |
|             | r                      | 0.867  | 0.857  | 0.880  | 0.966  | -0.177 |
|             | RMSE                   | 0.287  | 0.195  | 0.193  | 0.289  | 1.000  |
|             | MAE                    | 0.179  | 0.153  | 0.143  | 0.214  | 0.689  |
|             | RMB                    | 0.838  | 0.987  | 0.907  | 0.838  | 0.320  |
|             | above EE (%)           | 3.80   | 0.00   | 6.98   | 0.00   | 0.00   |
|             | within EE (%)          | 62.03  | 63.16  | 62.79  | 64.29  | 33.33  |
|             | below EE (%)           | 34.18  | 36.84  | 30.23  | 35.71  | 66.67  |
| Taihu       | slope                  | 1.088  | 1.113  | 1.144  | 0.966  | 1.051  |
|             | intercept              | 0.102  | -0.025 | 0.120  | 0.214  | 0.106  |
|             | N                      | 368    | 49     | 138    | 52     | 129    |
|             | r                      | 0.918  | 0.801  | 0.908  | 0.928  | 0.906  |
|             | RMSE                   | 0.253  | 0.123  | 0.287  | 0.334  | 0.210  |
|             | MAE                    | 0.198  | 0.100  | 0.241  | 0.253  | 0.167  |
|             | RMB                    | 1.249  | 1.043  | 1.319  | 1.218  | 1.228  |
|             | above EE (%)           | 55.71  | 28.57  | 68.12  | 57.69  | 51.94  |
|             | within EE (%)          | 40.22  | 55.10  | 28.99  | 40.38  | 46.51  |
|             | below EE (%)           | 4.08   | 16.33  | 2.90   | 1.92   | 1.55   |
| Xuzhou-CUMT | slope                  | 1.131  | 1.131  | 1.242  | 0.958  | 1.104  |
|             | intercept              | -0.035 | -0.042 | -0.091 | 0.072  | -0.023 |
|             | N                      | 389    | 144    | 117    | 23     | 105    |
|             | r                      | 0.929  | 0.920  | 0.923  | 0.924  | 0.946  |
|             | RMSE                   | 0.130  | 0.097  | 0.149  | 0.192  | 0.129  |
|             | MAE                    | 0.091  | 0.072  | 0.109  | 0.142  | 0.084  |
|             | RMB                    | 1.063  | 1.037  | 1.082  | 1.102  | 1.060  |
|             | above EE (%)           | 16.45  | 11.81  | 21.37  | 39.13  | 12.38  |
|             | within EE (%)          | 75.84  | 81.25  | 68.38  | 47.83  | 82.86  |
|             | below EE (%)           | 7.71   | 6.94   | 10.26  | 13.04  | 4.76   |

**Table S2** City-level trends of high-resolution MODIS MAIAC AOD in Jiangsu province from 2000 to 2009. The symbol asterisk (\*) represents change at a 95% significant level.

| Time   | Nanjing | Wuxi   | Xuzhou | Changzhou | Suzhou | Nantong | Lianyungang | Huaian | Yancheng | Yangzhou | Zhenjiang | Taizhou  | Suqian | Jiangsu |
|--------|---------|--------|--------|-----------|--------|---------|-------------|--------|----------|----------|-----------|----------|--------|---------|
| Jan    | 0.006   | 0.011  | 0.032* | 0.005     | 0.012  | 0.022   | 0.028*      | 0.004  | 0.014    | -0.0003  | 0.014     | 0.024    | 0.022  | 0.026*  |
| Feb    | 0.040*  | 0.039* | 0.045* | 0.035*    | 0.005  | 0.027   | 0.040*      | 0.039  | 0.029*   | 0.040*   | 0.029     | 0.039    | 0.036  | 0.040   |
| Mar    | 0.025*  | 0.025  | 0.015* | 0.023*    | 0.019  | 0.013   | 0.020       | 0.014  | -0.001   | 0.023    | 0.015     | 0.010    | 0.023  | 0.010   |
| Apr    | 0.028*  | 0.023  | 0.032* | 0.044     | 0.023* | 0.023*  | 0.029*      | 0.023* | 0.025*   | 0.022*   | 0.032*    | 0.020*   | 0.020* | 0.025*  |
| May    | 0.020   | -0.007 | 0.018  | -0.002    | -0.009 | 0.010*  | 0.010       | 0.022  | 0.010    | 0.012    | 0.020     | 0.011    | 0.012  | 0.015   |
| Jun    | 0.010   | 0.051  | 0.033  | 0.070*    | 0.079* | 0.071*  | 0.069*      | 0.035  | 0.031    | 0.046    | 0.074*    | 0.042    | 0.025  | 0.027   |
| Jul    | 0.065*  | 0.043  | 0.046  | 0.046     | 0.017  | 0.058   | 0.054       | 0.026  | 0.055    | 0.070*   | 0.055*    | 0.043    | 0.043  | 0.035   |
| Aug    | 0.034   | 0.048* | 0.021  | 0.029     | 0.040  | 0.042*  | 0.007       | 0.017  | 0.021    | 0.021    | 0.022     | 0.048*   | 0.009  | 0.032*  |
| Sep    | 0.029*  | 0.032  | 0.024  | 0.035     | 0.029* | 0.008   | 0.011       | 0.013  | 0.006    | 0.016    | 0.034     | 0.010    | 0.023  | 0.034   |
| Oct    | 0.034*  | 0.041* | 0.067  | 0.023     | 0.030* | 0.029*  | 0.041       | 0.045  | 0.033*   | 0.036*   | 0.028*    | 0.032*   | 0.044* | 0.051*  |
| Nov    | 0.003   | 0.008  | 0.029* | 0.015     | 0.012  | 0.021   | 0.023*      | -0.003 | 0.018*   | 0.015    | 0.016     | 0.019    | 0.004  | 0.009   |
| Dec    | 0.001   | 0.009  | 0.001  | 0.003     | 0.004  | 0.002   | 0.002       | 0.007  | 0.019    | 0.007    | -0.003    | -0.00005 | 0.003  | 0.009   |
| Winter | 0.016*  | 0.015* | 0.025* | 0.011     | 0.007  | 0.016*  | 0.023*      | 0.014  | 0.020*   | 0.022*   | 0.015     | 0.020*   | 0.018  | 0.026*  |
| Spring | 0.020   | 0.014  | 0.024* | 0.019     | 0.015  | 0.017*  | 0.021       | 0.019  | 0.009    | 0.021    | 0.026     | 0.018*   | 0.018  | 0.021*  |
| Summer | 0.034   | 0.052* | 0.037* | 0.052*    | 0.051* | 0.058*  | 0.041       | 0.036  | 0.034    | 0.036*   | 0.054*    | 0.036    | 0.028  | 0.036*  |
| Autumn | 0.032*  | 0.025* | 0.027* | 0.027*    | 0.025  | 0.020*  | 0.032       | 0.017  | 0.019    | 0.022*   | 0.023*    | 0.015    | 0.026* | 0.033*  |
| Annual | 0.023*  | 0.027* | 0.025* | 0.028*    | 0.021* | 0.026*  | 0.022*      | 0.016* | 0.021*   | 0.028*   | 0.026*    | 0.020*   | 0.019  | 0.024*  |

**Table S3** City-level trends of high-resolution MODIS MAIAC AOD in Jiangsu province from 2010 to 2019. The symbol asterisk (\*) represents change at a 95% significant level.

| Time   | Nanjing | Wuxi    | Xuzhou  | Changzhou | Suzhou  | Nantong | Lianyungang | Huaian  | Yancheng | Yangzhou | Zhenjiang | Taizhou | Suqian  | Jiangsu |
|--------|---------|---------|---------|-----------|---------|---------|-------------|---------|----------|----------|-----------|---------|---------|---------|
| Jan    | -0.020  | -0.022  | -0.009  | -0.019    | -0.020  | -0.024  | -0.012      | -0.023  | -0.010   | -0.004   | -0.021    | -0.021  | -0.028  | -0.021  |
| Feb    | -0.024  | -0.039  | -0.011  | -0.027    | -0.042  | -0.034  | 0.016       | -0.005  | -0.019   | -0.002   | -0.029    | -0.032  | -0.010  | -0.017  |
| Mar    | -0.019  | -0.005  | -0.005  | -0.007    | -0.011  | -0.018  | -0.007      | 0.002   | -0.001   | -0.001   | -0.016    | -0.007  | -0.002  | -0.003  |
| Apr    | -0.003  | -0.0003 | 0.015   | 0.006     | -0.004  | -0.007  | 0.021       | 0.015   | 0.010    | 0.011    | 0.004     | -0.002  | 0.020   | 0.007   |
| May    | -0.017  | -0.026* | -0.030  | -0.028*   | -0.016  | -0.022* | -0.010      | -0.022  | -0.027*  | -0.031   | -0.036*   | -0.037* | -0.021  | -0.015* |
| Jun    | -0.074  | -0.047  | -0.106* | -0.059*   | -0.021  | -0.091* | -0.054      | -0.079* | -0.084*  | -0.066   | -0.086    | -0.092* | -0.067* | -0.070* |
| Jul    | -0.054  | -0.052  | -0.069* | -0.045    | -0.033  | -0.033  | -0.055      | -0.045  | -0.051   | -0.062   | -0.041    | -0.064  | -0.044  | -0.032  |
| Aug    | -0.030  | -0.041  | -0.047* | -0.026    | -0.033  | -0.033  | -0.077*     | -0.047* | -0.048*  | -0.046*  | -0.069*   | -0.034* | -0.037* | -0.046* |
| Sep    | 0.001   | -0.009  | -0.029  | -0.008    | -0.015  | -0.002  | -0.037      | -0.012  | -0.021   | -0.011   | -0.003    | -0.007  | -0.013  | -0.016  |
| Oct    | -0.026* | -0.023  | -0.033* | -0.019*   | -0.024  | -0.029  | -0.027*     | -0.016  | -0.016   | -0.014   | -0.015    | -0.024  | -0.024  | -0.026  |
| Nov    | -0.024* | -0.033* | -0.002  | -0.028*   | -0.029* | -0.035* | -0.011      | -0.022* | -0.033*  | -0.026*  | -0.030*   | -0.033* | -0.019  | -0.022  |
| Dec    | 0.009   | 0.003   | -0.001  | 0.001     | 0.007   | -0.006  | 0.004       | 0.001   | -0.008   | 0.001    | -0.004    | -0.002  | 0.004   | 0.003   |
| Winter | -0.017  | -0.014  | -0.012  | -0.016    | -0.016  | -0.016  | -0.007      | -0.016  | -0.010   | -0.011   | -0.016    | -0.019  | -0.013  | -0.013  |
| Spring | -0.013  | -0.012  | -0.009  | -0.010    | -0.011  | -0.025  | 0.002       | 0.003   | -0.006   | -0.005   | -0.013    | -0.019  | -0.001  | -0.004  |
| Summer | -0.053  | -0.042* | -0.072* | -0.044    | -0.037  | -0.048* | -0.072*     | -0.064* | -0.065*  | -0.061*  | -0.068*   | -0.055* | -0.051* | -0.054* |
| Autumn | -0.016* | -0.018  | -0.021  | -0.021*   | -0.019  | -0.023* | -0.022      | -0.019* | -0.023*  | -0.015*  | -0.017*   | -0.020* | -0.019  | -0.020* |
| Annual | -0.023* | -0.025* | -0.030* | -0.027*   | -0.018  | -0.026* | -0.020*     | -0.023* | -0.022*  | -0.026*  | -0.033*   | -0.032* | -0.020* | -0.019* |

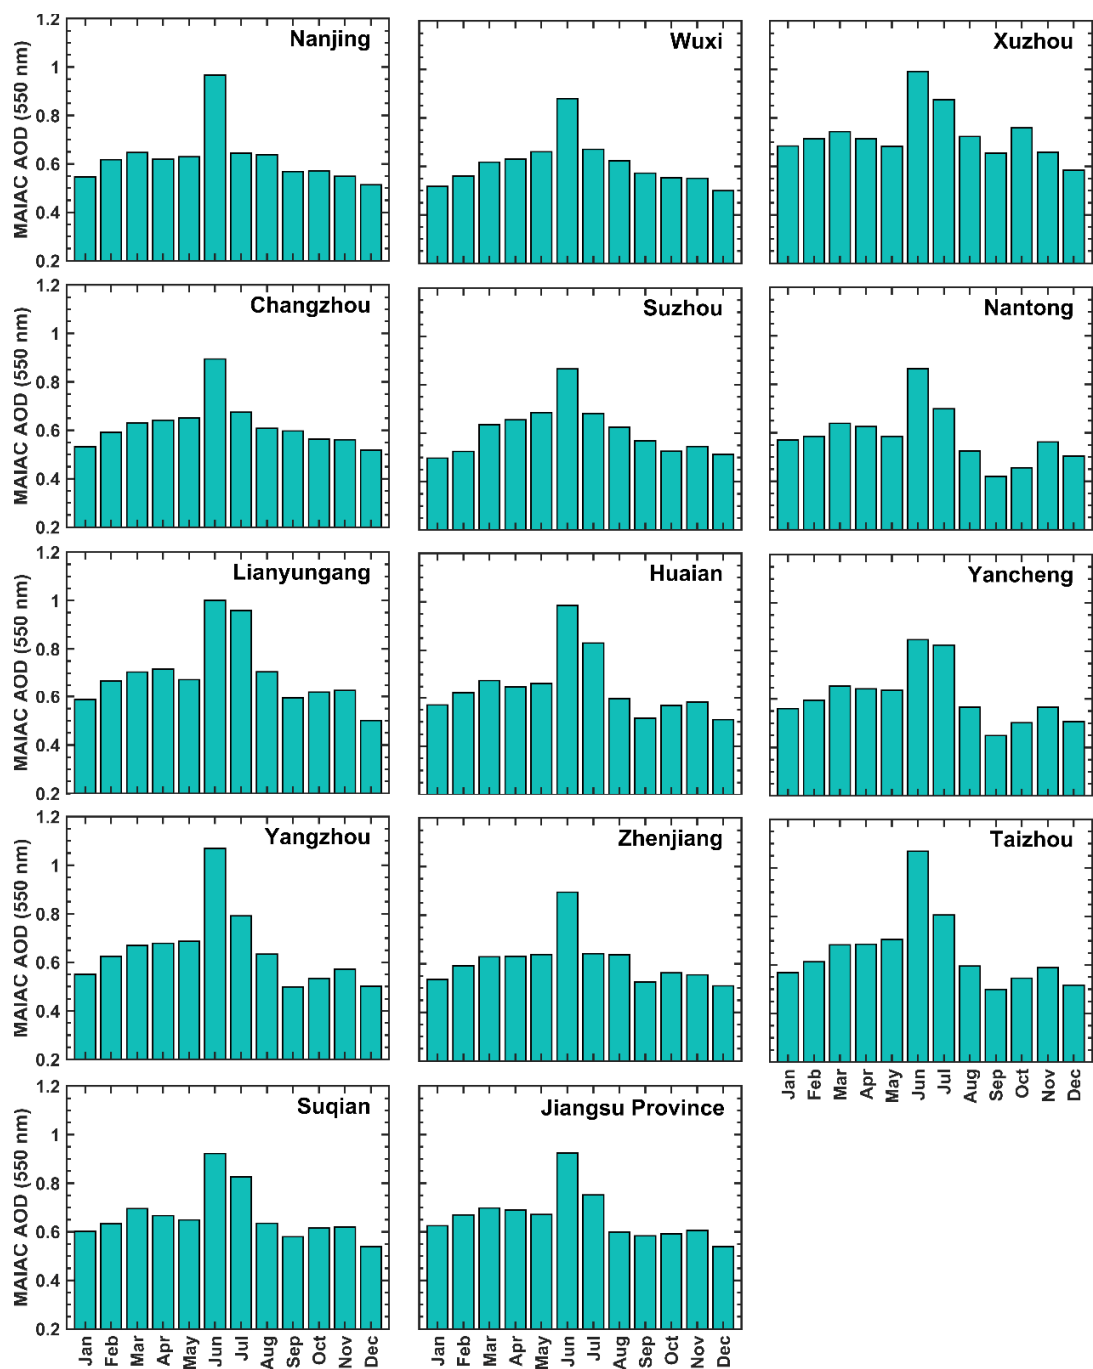

**Figure S1.** Monthly variations of high-resolution MODIS MAIAC AOD in 13 cities in Jiangsu Province from 2000 to 2020.
